1 **Anaerobic derivatives of mitochondria and peroxisomes in the free-living amoeba**

2 ***Pelomyxa schiedti* revealed by single-cell genomics**

3

4 Kristína Záhonová<sup>1,2,\*</sup>, Sebastian Cristian Treitli<sup>1</sup>, Tien Le<sup>1</sup>, Ingrid Škodová-Sveráková<sup>2,3</sup>, Pavla  
5 Hanousková<sup>4</sup>, Ivan Čepička<sup>4</sup>, Jan Tachezy<sup>1</sup>, Vladimír Hampel<sup>1,\*</sup>

6

7 <sup>1</sup> Department of Parasitology, Faculty of Science, Charles University, BIOCEV, Vestec, Czech  
8 Republic

9 <sup>2</sup> Institute of Parasitology, Biology Centre, Czech Academy of Sciences, České Budějovice  
10 (Budweis), Czech Republic

11 <sup>3</sup> Department of Biochemistry, Faculty of Natural Sciences, Comenius University, Bratislava,  
12 Slovakia

13 <sup>4</sup> Department of Zoology, Faculty of Science, Charles University, Prague, Czech Republic

14

15 \* Corresponding authors: [kika.zahonova@gmail.com](mailto:kika.zahonova@gmail.com) (KZ); [vlada@natur.cuni.cz](mailto:vlada@natur.cuni.cz) (VH)

16

17

18

19

20

21

22

## 23 **Abstract**

24 *Pelomyxa schiedti* is a free-living amoeba belonging to the group Archamoebae, which  
25 encompasses anaerobes bearing mitochondrion-related organelles (MROs) – hydrogenosomes  
26 in free-living *Mastigamoeba balamuthi* and mitosomes in the human pathogen *Entamoeba*  
27 *histolytica*. Anaerobic peroxisomes, another adaptation to anaerobic lifestyle, were identified  
28 only recently in *M. balamuthi*. We found evidence for both these organelles in the single-cell-  
29 derived genome and transcriptome of *P. schiedti*, and corresponding vesicles were tentatively  
30 revealed in electron micrographs. *In silico* reconstructed MRO metabolism seems similar to that  
31 of *M. balamuthi* harboring respiratory complex II, electron-transferring flavoprotein, partial TCA  
32 cycle running presumably in reductive direction, pyruvate:ferredoxin oxidoreductase, [FeFe]-  
33 hydrogenases, glycine cleavage system, and sulfate activation pathway. The cell disposes with  
34 an expanded set of NIF enzymes for iron sulfur cluster assembly, but their localization remains  
35 unclear. Quite contrary, out of 67 predicted peroxisomal enzymes, only four were reported also  
36 in *M. balamuthi*, namely peroxisomal processing peptidase, nudix hydrolase, inositol 2-  
37 dehydrogenase, and D-lactate dehydrogenase. Other putative functions of peroxisomes could  
38 be pyridoxal 5'-phosphate biosynthesis, amino acid and carbohydrate metabolism, and  
39 hydrolase activities. Future experimental evidence is necessary to define functions of this  
40 surprisingly enzyme-rich anaerobic peroxisome.

41

42

## 43 **Author summary**

44 A major part of the microbial diversity cannot be cultured in isolation, and so it escapes from  
45 traditional ways of investigation. In this paper, we demonstrate the successful approach for  
46 generating good-quality genome and transcriptome drafts from a peculiar amoeba *Pelomyxa*  
47 *schiedti* using single-cell methods. *P. schiedti* is a member of Archamoebae clade harboring  
48 microaerobic protists including a free-living *Mastigamoeba balamuthi* and a human parasite  
49 *Entamoeba histolytica*. Mitochondria and peroxisomes represent two organelles that are most  
50 affected during adaptation to microoxic or anoxic environments. Mitochondria are known to  
51 transform to anaerobic mitochondria, hydrogenosomes, mitosomes, and various transition  
52 stages in between, all of which encompass different enzymatic capacity. Anaerobic  
53 peroxisomes have been first noticed in *M. balamuthi*, but their function remained unclear for  
54 now. Data obtained in this study were used for revealing the presence and for the detailed  
55 functional annotations of anaerobic derivatives of mitochondria and peroxisomes in *P. schiedti*,  
56 which were corroborated by transmission electron microscopy.

57

58

## 59 **Introduction**

60 Transition to life in low oxygen environments requires significant modifications of cell  
61 biochemistry and organellar make up. Several lineages of protists have undergone such  
62 transitions and exemplify partly convergent solutions [1–3]. Mitochondria and peroxisomes  
63 have been most significantly remodeled in this process, as they are the key places of oxygen-  
64 dependent metabolism and oxygen detoxification.

65 Mitochondria are double-membrane-bound organelles, which have arisen from  
66 engulfment of a prokaryotic lineage related to alphaproteobacteria [2,4–6]. Since then, they  
67 have diverged into a range of categories [1] and plethora of transitional forms [7,8], collectively  
68 designated as mitochondrion related organelles (MROs), while only a single case of complete  
69 loss has been reported [9]. Substantial collection of typical mitochondrial functionalities, such  
70 as oxidative phosphorylation, carbon, amino acid and fatty-acid metabolism, iron-sulfur (FeS)  
71 cluster assembly, homeostasis, and apoptosis, has been reduced to various extent in MROs  
72 [10–12].

73 Peroxisomes are bound by a single membrane and characterized by a highly conserved  
74 set of proteins (peroxins) essential for their biogenesis [13,14]. The matrix content and  
75 consequently the repertoire of metabolic pathways is very variable reflecting high versatility of  
76 peroxisomal functions [15]. Most frequently, they possess oxidases reducing molecular oxygen  
77 to hydrogen peroxide (H<sub>2</sub>O<sub>2</sub>), and catalase for its detoxification. Not surprisingly, they are  
78 absent from most anaerobes, such as *Giardia* and *Trichomonas* [16]; however, anaerobic  
79 peroxisomes were recently reported from *Mastigamoeba balamuthi* [17].

80 Archamoebae represents a clade of microaerophilic protists nested within a broader  
81 group of predominantly aerobic amoebozoans [18,19] represented e.g. by *Dictyostelium*  
82 *discoideum*, known to bear a classical aerobic mitochondrion [20], or by their more distant  
83 amoebozoan relative *Acanthamoeba castellanii* (Centramoebida) with mitochondria potentially  
84 adapted to periods of anaerobiosis and exhibiting a highly complex proteome [12,21]. Small to  
85 almost inconspicuous MROs have been characterized in two Archamoebae, the parasitic  
86 *Entamoeba histolytica* and the free-living *M. balamuthi*. The only known function of *E.*

87 *histolytica* mitosome is production and export of activated sulfate – phosphoadenosine-5'-  
88 phosphosulfate (PAPS) [22]. Metabolic capacity of *M. balamuthi* hydrogenosome is  
89 substantially broader involving pyruvate and amino acid metabolism, ATP production, and FeS  
90 cluster assembly [23–25]. Another adaptation of *M. balamuthi* to the low oxygen environment  
91 is represented by anaerobic peroxisomes that lack catalase and enzymes of  $\beta$ -oxidation of fatty  
92 acids but harbor several enzymes of pyrimidine and CoA biosynthesis and acyl-CoA and  
93 carbohydrate metabolism [17].

94 *Pelomyxa* is a free-living archamoeba distantly related to *M. balamuthi* [18], and so it  
95 represents valuable point for tracing the evolution of anaerobic adaptations. There is a single  
96 report on MROs in the giant species *P. palustris* [26] but their metabolism is unknown. Using  
97 methods of single-cell -omics and electron microscopy, we bring clear evidence for the  
98 presence of both MROs and peroxisomes in its smaller cousin *P. schiedti* [27].

99

100

## 101 **Results and discussion**

### 102 **General features of assemblies**

103 *P. schiedti* single-cell genome assembly of 52.4 Mb contained 5,338 scaffolds with an  
104 N50=51,552 bp (S1 Table) and 19,965 predicted proteins. We identified a single small subunit  
105 ribosomal RNA gene (18S rDNA). In the 18S phylogeny, *P. schiedti* was sister to other *Pelomyxa*  
106 species inside the Pelomyxidae clade (88% standard bootstrap) within a robust clade (94%  
107 standard bootstrap) of Archamoebae (Fig 1, S1 Fig). The decontaminated transcriptome  
108 assembly of 76.6 Mb comprised 43,993 contigs. BUSCO was used to estimate completeness of

109 assemblies and to compare them to the *M. balamuthi* genome (S2 Fig, S1 Table). Transcriptome  
110 contained 83.2% of complete and 2.0% of fragmented BUSCO genes, while in the genome-  
111 derived proteome the proportions were 81.9% and 3.6%, respectively. With 82.8% complete  
112 and 3.0% fragmented genes [28], the completeness of *M. balamuthi* data was comparable.  
113 36.0% of BUSCOs were duplicated in the transcriptome assembly, while only 8.6% in genomic,  
114 reflecting a higher number of contigs or presence of isoforms in the former. It should be noted  
115 that for non-model eukaryotes, which *Pelomyxa* certainly is, the BUSCO completeness is not  
116 expected to reach 100%, because some of the orthologues might be absent and/or diverged  
117 beyond recognition. Altogether, our analyses showed considerably high completeness of both  
118 assemblies.

119

#### 120 **Fig 1. Phylogenetic analysis of amoebozoan 18S rDNA.**

121 The Maximum Likelihood tree places *Pelomyxa schiedti* in monophyletic Pelomyxidae group  
122 inside monophyletic Archamoebae. Standard bootstrap support values are shown when  $\geq 50\%$ .  
123 Outgroup was collapsed for simplicity (for full tree see S1 Fig).

124

125 *P. schiedti* genes encompass 149,016 introns (S1 Table), which accounts for an intron  
126 density of 7.46, almost twice higher than in *M. balamuthi* (3.74). While protists' genomes have  
127 usually lower intron densities, several organisms in IntronDB [29] exhibit similar intron density  
128 as *Pelomyxa*, e.g., the choanoflagellates *Monosiga brevicolis* (6.53) and *Salpingoeca rosetta*  
129 (7.44), the chromerid *Vitrella brassicaformis* (7.45), or the chlorarachniophyte *Bigelowiella*  
130 *natans* (7.85). The vast majority of introns (98.41%) contained canonical GT-AG boundaries,

131 1.59% possessed GC-AG boundaries, and one an unusual GT-GG intron boundary (S1 Table).

132 Similar frequencies of intron boundaries were observed in *M. balamuthi* (S1 Table and [28]).

133

#### 134 **Putative MRO proteome**

135 The major focus of this study was to reveal the presence and to characterize the putative

136 proteomes of MRO and peroxisome of *P. schiedti*. We used a combined approach to search for

137 proteins possibly involved in the MRO metabolism and biogenesis by: (i) retrieving homologues

138 of MRO- or mitochondrion-targeted proteins of *E. histolytica*, *M. balamuthi*, and *A. castelanii*,

139 and (ii) predicting N-terminal mitochondrial targeting sequence (NTS) by four tools. The

140 resulting *in silico* predicted MRO proteome consists of 51 proteins (Fig 2, S2 Table) and provides

141 functionalities described below.

142

#### 143 **Fig 2. Overview of the *Pelomyxa schiedti* MRO metabolism.**

144 Proteins were identified by BLAST or HMMER searches and their intracellular localization was

145 predicted by TargetP, PSORT II, MultiLoc2, and NommPred tools. Confidence of MRO

146 localization is enhanced by shades of blue as explained in graphical legend above the scheme.

147 Multiple copies of a protein are shown as overlapping ovals. Potential end-products are boxed

148 in dark-fuchsia color. ATP production and consumption are highlighted by dark- and light-pink

149 boxes around ATP, respectively. Abbreviations: AAT, aspartate alanine transferase; ACL, ATP-

150 citrate lyase; ACO, aconitase; ACS, acetyl-CoA synthetase; AK, adenylate kinase; APS,

151 adenosine-5'-phosphosulfate; APSK, adenosine-5'-phosphosulfate kinase; AS, ATP sulfurylase;

152 cpn10, chaperonin 10; cpn60, chaperonin 60; CIC, citrate carrier; CoA, coenzyme A; ETFa,

153 electron transferring flavoprotein subunit alpha; ETFb, electron transferring flavoprotein  
154 subunit beta; ETFDH, electron transferring flavoprotein dehydrogenase; Fe-ADH, iron-  
155 containing alcohol dehydrogenase; Fd, ferredoxin; FH, fumarase; GDH, glutamate  
156 dehydrogenase; H, GCSH protein; HSP70, heat shock protein 70; HydA, [FeFe]-hydrogenase;  
157 HydE, hydrogenase maturase; HydF, hydrogenase maturase; HydG, hydrogenase maturase; IDH,  
158 isocitrate dehydrogenase; IPP, inorganic pyrophosphatase; L, GCSL protein; D-LDH, D-lactate  
159 dehydrogenase; LPLA, lipoamide protein ligase; MCF, mitochondrial carrier family; MDH, malate  
160 dehydrogenase; MPP a+b, mitochondrial processing peptidase subunit alpha and beta; NaS,  
161 sodium/sulfate symporter; NifS, cysteine desulfurase; NifU+FdhD, scaffold protein + formate  
162 dehydrogenase accessory sulfurtransferase; OGC, 2-oxoglutarate carrier; P, GCSP protein;  
163 P5CDH, pyrroline-5-carboxylate dehydrogenase; P5CR, pyrroline-5-carboxylate reductase; PAPS,  
164 3'-phosphoadenosine 5'-phosphosulfate; PC, pyruvate carboxylase; PFO, pyruvate:ferredoxin  
165 oxidoreductase; PNT, pyridine nucleotide transhydrogenase; ProDH, proline dehydrogenase;  
166 RQ, rodoquinone; RQH2, rodoquinol; RquA, RQ methyltransferase; SAM, sorting and assembly  
167 machinery; SDH5, succinate dehydrogenase assembly factor; SDHA, succinate dehydrogenase  
168 subunit A; SDHB, succinate dehydrogenase subunit B; SDHC, succinate dehydrogenase subunit  
169 C; SDHD, succinate dehydrogenase subunit D; SHMT, serine hydroxymethyltransferase; T, GCST  
170 protein; THF, tetrahydrofolate; THF-CH2, N<sup>5</sup>,N<sup>10</sup>-methylenetetrahydrofolate; TOM/TIM,  
171 translocase of the outer/inner membrane; UQ, ubiquinone; Zn-ADH, zinc-containing alcohol  
172 dehydrogenase.

173

174 **Protein import machinery**



175 Despite sensitive HMMER searching we identified only three subunits of the outer membrane  
176 translocase (TOM) and the sorting and assembly machinery (SAM) complexes — Tom40,  
177 Sam50, and Sam37 (Fig 2). All three proteins had corresponding domains predicted by  
178 InterProScan. Many homologues of the canonical opisthokont subunits are missing (S2 Table),  
179 as are all parts of the translocase of the inner membrane (TIM), and so the mechanism of  
180 protein import across this membrane remains unclear. The situation resembles other  
181 Archamoebae [23,28,30], suggesting that their translocons are either highly streamlined and/or  
182 contain highly divergent or lineage-specific subunits as reported from trichomonads or  
183 trypanosomes [31,32].

184 Enzymes involved in processing (matrix processing peptidase) and folding (chaperonins  
185 cpn10 and cpn60) are present. HSP70 was detected in 14 copies, none of them confidently  
186 predicted to mitochondrion (S2 Table). Phylogenetic analysis revealed a single MRO candidate  
187 (Pelo10550) branching sister to *M. balamuthi* mtHSP70 within the mitochondrial clade (S3 Fig).  
188 The other HSP70 paralogues fell into the ER or cytosolic clades, the latter being diversified in  
189 ten copies all forming robust clades with *M. balamuthi* sequences.

190 Although we have probably revealed only a fragment of the inventory needed for the  
191 protein import into the *P. schiedtii* MRO, the presence of the hallmarks—Tom40, Sam50,  
192 mtHSP70, and cpn60—conclusively shows that the MRO is truly present.

193

#### 194 **Tricarboxylic acid cycle and electron transport chain**

195 *P. schiedti* encodes four enzymes of the tricarboxylic acid (TCA) cycle possessing NTS (S2 Table)  
196 and catalyzing consecutive reactions. ATP citrate lyase (ACL) is typical for the reductive

197 direction of TCA, while others, fumarate hydratase (fumarase/FH), malate dehydrogenase  
198 (MDH), and four subunits of the succinate dehydrogenase complex (SDH/complex II/CII), are  
199 common for both, oxidative and reductive TCA. The absence of CII subunit SDH5/SDHAF  
200 involved in the flavination of SDHA subunit [33] is likely common for Archamoebae as it is  
201 absent also from *M. balamuthi* [24].

202 Homologues of *A. castellanii* respiratory complexes were not identified, except for the  
203 aforementioned CII and a quinone-dependent electron-transferring flavoprotein (ETF; S2  
204 Table). Both soluble subunits, alpha (ETFa) and beta (ETFb), and the membrane-bound ETF  
205 dehydrogenase (ETFDH), are present but only ETFDH and ETFa contain a recognizable NTS. It  
206 has been proposed in *M. balamuthi* that electrons may be transferred in an unknown direction  
207 between ETF and rholoquinone (RQ), a quinone molecule with a lower electron potential than  
208 ubiquinone [3,34]. RQ is in *M. balamuthi* synthesized by a hydrogenosomal methyltransferase  
209 dubbed RquA [34], which was detected also in *P. schiedti* (S2 Table). RQ presence allows  
210 delivery of electrons to CII that could function as fumarate reductase [35] producing succinate,  
211 the putative end product of the partial reverted TCA in both Archamoebae [24], which may be  
212 secreted as in *Trypanosoma* [36].

213

#### 214 **Pyruvate and ATP metabolism**

215 Pyruvate is in aerobic mitochondria oxidatively decarboxylated to acetyl-coenzyme A (CoA) by  
216 the pyruvate dehydrogenase (PDH) complex. In most MROs, PDH is substituted by  
217 pyruvate:ferredoxin oxidoreductase (PFO), pyruvate:NADP<sup>+</sup> oxidoreductase (PNO), or pyruvate  
218 formate lyase (PFL) [2]. We identified six copies of PFO and one copy of PNO in the *P. schiedti*

219 genome, all without NTS (S2 Table). However, one of the *P. schiedti* PFOs was sister to one of  
220 the *M. balamuthi* putatively hydrogenosomal PFOs [24] (S4 Fig). We assume that this PFO  
221 homologue operates in *P. schiedti* MRO. Another pyruvate-metabolizing enzyme predicted to  
222 MRO is pyruvate carboxylase (PC; S2 Table) producing oxaloacetate [37], a substrate of MDH. In  
223 *M. balamuthi*, pyruvate may be produced by the activity of NAD<sup>+</sup>-dependent D-lactate  
224 dehydrogenase (D-LDH), of which one is present in hydrogenosome and the other in  
225 peroxisome [17,24]. *P. schiedti* bears only one homologue of D-LDH that is predicted to  
226 peroxisomes (S3 Table), thus pyruvate is likely imported to MRO from cytosol.

227 Two ATP-synthesizing enzymes are putatively present. Acetyl-CoA synthetase (ACS),  
228 enzyme converting acetyl-CoA to acetate, CoA, and ATP, was found in eight copies, four of  
229 which possessed a putative NTS. ATP may be formed also by the adenylate kinase (AK)  
230 catalyzing interconversion of adenine nucleotides. Three of the six AKs are putatively localized  
231 in the MRO (S2 Table). In this respect, the situation resembles *M. balamuthi* hydrogenosome  
232 [24]. Third putative source of ATP is the antiport against PAPS.

233

#### 234 **Amino acid metabolism**

235 Glycine cleavage system (GCS) is at least partially retained in many MROs [38]. It consists of  
236 four enzymes (H-, L-, T-, and P-protein) and methylates tetrahydrofolate (THF) while  
237 decomposing glycine into CO<sub>2</sub> and ammonia. THF methylation is also provided by the serine  
238 hydroxymethyltransferase (SHMT) [39]. We identified all GCS enzymes and SHMT in *P. schiedti*,  
239 all with predicted NTS (Fig 2, S2 Table). L-protein was present in two copies with only one  
240 bearing NTS, similarly to *M. balamuthi*. The function of the second copy is unknown [24].

241 Lipoamide protein ligase (LPLA) necessary for lipoamide attachment to GCSH was present with  
242 NTS. The resulting N<sup>5</sup>,N<sup>10</sup>-methylene tetrahydrofolate (CH<sub>2</sub>-THF) is an intermediate in one-  
243 carbon metabolism and cofactor for the synthesis of pyrimidines and methionine in both  
244 mitochondria and cytosol. Two cytosolic enzymes requiring this cofactor, B12-dependent  
245 methionine synthase and THF dehydrogenase/cyclohydrolase, were detected (S2 Table).  
246 Glycine can be produced in mitochondria from threonine by threonine dehydrogenase (TDH)  
247 and alpha-amino-beta-ketobutyrate CoA ligase (AKL) [40] but both proteins lack a recognizable  
248 NTS in *P. schiedti* (S2 Table). Consistently, TDH activity was measured only in the cytosolic  
249 fraction of *M. balamuthi* [24]. It is highly probable that this pathway operates in the cytosol of  
250 *P. schiedti* and glycine is imported to MRO.

251 To our surprise, we identified remnants of the proline degradation pathway presumably  
252 residing in *P. schiedti* MRO (Fig 2). In mitochondria, proline is usually degraded to glutamate by  
253 the function of proline dehydrogenase (ProDH) and pyrroline-5-carboxylate dehydrogenase  
254 (P5CDH) [41]. While ProDH is missing in *P. schiedti*, an alternative enzyme pyrroline-5-  
255 carboxylate reductase (P5CR) was predicted to be mitochondrion-targeted by one predictor (S2  
256 Table). P5CDH is present in *P. schiedti* but lacks predictable NTS. Glutamate can be further  
257 metabolized to 2-oxoglutarate by glutamate dehydrogenase (GDH) [41], which is present and  
258 predicted to be mitochondrion-targeted also by one tool (S2 Table).

259

## 260 **Cofactor regeneration**

261 NADH produced by GCS or during putative proline degradation would be in most mitochondria  
262 reoxidized by NADH dehydrogenases in the electron transport chain [41]. Since this is absent in

263 *P. schiedti*, we explored other ways for regeneration of this cofactor. One possibility is  
264 fermentation of aldehydes to alcohols by alcohol dehydrogenases [42] putatively targeted to  
265 the MRO (S2 Table). Another option is the reductive partial TCA cycle running from citrate to  
266 succinate consuming not only NADH but also electrons from ETFDH *via* CII producing succinate  
267 [43]. Citrate or oxaloacetate are necessary to fuel this pathway. We identified a mitochondrial  
268 citrate carrier (CIC; S2 Table) which belongs to SLC25A family and is known to exchange malate  
269 for cytosolic citrate in cancer cells under low concentration of oxygen [44]. ACL produces acetyl-  
270 CoA and oxaloacetate from citrate on the expense of ATP [45]. Acetyl-CoA may become a  
271 substrate for anabolic reactions or be used by ACS to regenerate both ATP and CoA (Fig 2),  
272 while oxaloacetate may enter the reverse TCA cycle becoming substrate of MDH, regenerating  
273 NAD<sup>+</sup>. The malate pool is maintained also by 2-oxoglutarate carrier (OGC; S2 Table). In the  
274 cytosol, 2-oxoglutarate can be reductively carboxylated to replenish citrate [46]. Oxaloacetate  
275 may alternatively be produced from pyruvate by PC with ATP consumption or by the action of  
276 aspartate amino transferase (S2 Table). The latter enzyme may balance the ratio of 2-  
277 oxoglutarate + aspartate: oxalacetate + glutamate; however, the origin and fate of aspartate is  
278 unclear due to the absence of the glutamate-aspartate antiporter (S2 Table).

279 Pyridine nucleotide transhydrogenase (PNT) is predicted to MRO by a single predictor  
280 (S2 Table). PNT usually localizes in the inner mitochondrial membrane and pumps protons while  
281 transferring electrons between NADH and NADPH [47]. PNT is present in *M. balamuthi* and *E.*  
282 *histolytica* [23,48], however in *E. histolytica*, it was shown to localize outside mitosomes [49],  
283 which calls into question its MRO location in other Archamoebae.

284 MRO contains two additional electron sinks with unclear purpose. ETF and ETFDH  
285 proteins are known to use electrons from oxidation of fatty acids, which is absent in *P. schiedti*  
286 MRO. Finally, [FeFe]-hydrogenases uptake electrons from reduced ferredoxins and produce  
287 molecular hydrogen. Three of the six detected hydrogenases bear putative NTS. Hydrogenases  
288 contain catalytic H cluster and its maturation is dependent on maturases (HydE, HydF, and  
289 HydG) [50], which are all present and contain NTS (S2 Table). Reduced ferredoxin may originate  
290 from pyruvate oxidation.

291

### 292 **Iron-sulfur cluster assembly**

293 Mitochondria usually house the iron-sulfur cluster assembly (ISC) pathway inherited from  
294 alphaproteobacteria serving for maturation of both, mitochondrial and cytosolic FeS proteins  
295 [51]. Some organisms, including Archamoebae, have replaced it by another machinery *via*  
296 horizontal gene transfer [25,52]. *M. balamuthi* bears two copies of the nitrogen fixation (NIF)  
297 system, both comprising NifS and NifU proteins. While one pair of NIFs operates in cytosol, the  
298 other localizes in the hydrogenosome [25]. In *E. histolytica*, only cytosolic copy has been  
299 retained [24].

300 In *P. schiedti* MRO, hydrogenases and their maturases HydE and HydF, SDH, ferredoxin,  
301 and PFO are putative clients for NIF system. We identified seven NifS and three NifU proteins,  
302 of which only NifU (Pelo10620) contained predicted NTS (S2 Table). Interestingly, this protein  
303 consists of a NifU N-terminal domain fused to a formate dehydrogenase accessory  
304 sulfurtransferase (FdhD) C-terminal domain (S5A Fig). The *Escherichia coli* FdhD transfers sulfur  
305 from IscS to formate dehydrogenase (FdhF) and is essential for its activity [53]. *P. schiedti*

306 indeed encodes a FdhF homologue without NTS (S2 Table). In the NifU phylogeny (Fig 3A), the  
307 NifU domain of the fusion protein formed a long branch within a moderately supported (80%  
308 ultrafast bootstrap) clade of all Archamoebae NifUs. The other *P. schiedti* NifU sequences  
309 branched sister to hydrogenosomal and cytosolic *M. balamuthi* homologues. All three *P.*  
310 *schiedti* NifU sequences contained conserved cysteine residues (S5B Fig) necessary for their  
311 function [54].

312

### 313 **Fig 3. Analyses of NIF system components.**

314 (A-B) The Maximum Likelihood phylogenetic trees show that *Pelomyxa schiedti* possesses  
315 orthologues of hydrogenosomal and cytosolic NifU (A) and NifS (B) proteins from  
316 *Mastigamoeba balamuthi*. Hydrogenosomal proteins of *M. balamuthi* are marked with stars.  
317 The Maximum Likelihood tree was estimated with standard (BS) and ultrafast bootstrapping  
318 (UFB). The tree topology shown is from the ultrafast bootstrap analysis. Support values for  
319 <50% BS and <75% UFB are denoted by a dash (-), whereas an asterisk (\*) marks a topology that  
320 does not exist in a particular analysis. Fully supported nodes are shown as black circles, while  
321 nodes that were not supported are without any value. (C) Heterologous expression of two NifS  
322 sequences of *Pelomyxa schiedti* showed their cytosolic localization. Proteins were expressed in  
323 *Saccharomyces cerevisiae* with a GFP-tag at their C-terminus. Mitochondria were stained with  
324 MitoTracker. DIC, differential interference contrast. Scale bar: 5  $\mu$ m.

325

326 None of the seven NifS proteins was predicted to MRO (S2 Table). Two sequences were  
327 identical but incomplete at their C-termini and could not be completed by read mapping or PCR

328 amplification. In the phylogenetic analysis (Fig 3B), Pelo13211 and Pelo6206 branched sister to  
329 the hydrogenosomal and cytosolic *M. balamuthi* sequences, respectively. Pelo14142 was sister  
330 to candidate Riflebacteria species and the last four formed a long branch nested within the  
331 Archamoebae clade. All amino acid residues required for function [55] were present in both *P.*  
332 *schiedti* sequences that were sister to *M. balamuthi* (S5C Fig).

333         The phylogenetic pattern offers an elegant hypothesis in which NifS Pelo6206 and NifU  
334 Pelo14273 act in the cytosol, while NifS Pelo13211 and NifU Pelo19958 in MRO. The remaining  
335 NifS copies might be functional partners of the NifU-FdhD fusion protein (Pelo10620).  
336 Surprisingly, our experiments with heterologous localization of the MRO and cytosolic NifS  
337 candidates in *Saccharomyces cerevisiae* revealed cytosolic localization of both (Fig 3C), leaving  
338 the question of the FeS cluster assembly in *P. schiedti* MRO unresolved.

339

#### 340 **Sulfate activation pathway**

341 Sulfate activation pathway produces PAPS necessary for sulfolipid synthesis [22]. It is present in  
342 *E. histolytica* [22,56] and *M. balamuthi* [24] MROs, and we identified all of its components also  
343 in *P. schiedti* (Fig 2, S2 Table). The pathway requires two transporters. A sodium/sulfate  
344 symporter (NaS) is necessary for substrate delivery, however, its homologues in *P. schiedti* (S2  
345 Table) are unrelated to *E. histolytica* mitochondrial NaS [22] (S6A Fig) yielding their role unclear.  
346 The PAPS exporter belongs to the mitochondrial carrier family (MCF) and, indeed, one of *P.*  
347 *schiedti* MCF proteins branched sister to a clade of PAPS transporters of *E. histolytica* and *M.*  
348 *balamuthi* [28,57] (S6B Fig). As this transporter exchanges PAPS to ATP, it plays role in



349 supplementing the ATP pool in MRO, yet cannot provide a net ATP gain, because two ATP  
350 molecules are required for production of one PAPS.

351

### 352 **Anaerobic peroxisomes**

353 We have also investigated the presence of anaerobic peroxisomes, which were recently  
354 characterized in *M. balamuthi* [17]. *P. schiedti* encodes genes for 13 proteins required for  
355 peroxisome biogenesis (peroxins, Pexs) strongly suggesting presence of peroxisomes. Identified  
356 peroxins include Pex5 and Pex7 required for the recognition of peroxisomal targeting signal 1  
357 and 2 (PTS1 and PTS2), respectively, Pex13 and 14 mediating the protein import, Pex1, 2, 6, 10,  
358 and 12, which are receptor-recycling peroxins, Pex3, 16, and 19 involved in protein import to  
359 the peroxisomal membrane, and Pex11 participating in the peroxisome fission (S3 Table).  
360 Prediction of putative peroxisomal matrix proteins based on the PTS1/PTS2 presence revealed  
361 67 candidates (S3 Table). Interestingly, only four candidates were previously found in anaerobic  
362 peroxisomes of *M. balamuthi* that include peroxisomal processing peptidase (PPP), inositol 2-  
363 dehydrogenase, nudix hydrolase, and D-lactate dehydrogenase, all with clear support for  
364 localization in *P. schiedti* peroxisomes (S3 Table). Unlike in *M. balamuthi*, *P. schiedti*  
365 peroxisomes possibly contain pyridoxamine 5'-phosphate oxidase (PNPO) that utilizes  
366 molecular oxygen as an electron acceptor to catalyze the last step of the pyridoxal 5'-  
367 phosphate (PLP) biosynthesis with concomitant formation of ammonia and H<sub>2</sub>O<sub>2</sub>. The presence  
368 of PNPO raises a question how H<sub>2</sub>O<sub>2</sub> is detoxified as typical antioxidant enzymes, such as  
369 catalase and peroxidase, are not present. However, H<sub>2</sub>O<sub>2</sub> could be decomposed also  
370 nonenzymatically by antioxidants, such as 2-oxoglutarate, in which the ketone group of the  $\alpha$ -

371 carbon atom reacts with H<sub>2</sub>O<sub>2</sub> to form succinate, CO<sub>2</sub>, and water [58]. *P. schiedti* contains a  
372 putative glutamate dehydrogenase that may produce 2-oxoglutarate and that possesses –SKL  
373 triplet, a typical PTS1. However, the peroxisomal targeting was not supported by the PTS  
374 predictor, which considers twelve C-terminal amino acid residues. The other proteins with  
375 predicted peroxisomal localization include several enzymes of amino acid synthesis and  
376 degradation, carbohydrate metabolism and hydrolases, however without clear biochemical  
377 context. More experimental studies are required to verify predicted localizations and to  
378 delineate function of peroxisomes in *P. schiedti*.

379

#### 380 **Electron microscopy**

381 Finally, we were interested whether the two organelles described by the genomic data can be  
382 visualized by microscopy. Careful inspection of electron micrographs, indeed, revealed two  
383 populations of small vesicles, one presumably bounded by a double membrane while the other  
384 by a single (Fig 4). We ascribe them to putative MROs and peroxisomes *in silico* characterized in  
385 this work but leave the confirmation for further studies.

386

387 **Fig 4. Transmission electron micrograph of *Pelomyxa schiedti*, ultra-thin sections.** (A) The  
388 nuclear area. N, nucleus; black arrow, putative mitochondrion-related organelle; white arrow,  
389 small dense body (putative peroxisome); asterisk (\*), prokaryotic endosymbiont. (B-C) High  
390 magnification of putative mitochondrion-related organelle; black arrow, bounding double  
391 membrane. (D) Detail of the bounding double membrane. (E) High magnification of the small  
392 dense body (putative peroxisome). Scale bars: 400 nm for (A); 50 nm for (B-E).

393

## 394 **Conclusions**

395 Our bioinformatic survey of the putative proteome of *Pelomyxa schiedti* MRO revealed several  
396 interesting insights and opened many questions for further investigation of this amoeba. Most  
397 importantly, *P. schiedti* clearly does harbor an MRO with a very streamlined or lineage specific  
398 set of protein translocases, and peroxisomes with a set of 13 soluble and membrane associated  
399 peroxins. Our *in silico* predictions showed that the MRO provides the cell with the synthesis of  
400 PAPS, contains glycine cleavage system, [FeFe]-hydrogenase, and likely also a part of a TCA  
401 cycle running in reverse direction from citrate enabling concomitantly the production of acetyl-  
402 CoA. The electron transport chain is reduced to complex II and electron-transferring  
403 flavoprotein dehydrogenase, and possibly uses rholoquinone as the electron transporter. We  
404 predict that the source of reduced ferredoxin for [FeFe]-hydrogenase comes from pyruvate.  
405 The situation with the FeS cluster assembly in this amoeba seems rather complex as it contains  
406 the most diverse set of NIF pathway proteins of all previously investigated Archamoebae. These  
407 proteins very likely provide parallel FeS synthesis in MRO and cytoplasm, but in addition to this,  
408 some may be involved in the activation of formate dehydrogenase as seen in some prokaryotes.  
409 *P. schiedti* anaerobic peroxisomes, similarly to *M. balamuthi*, lack enzymes of  $\beta$ -oxidation of  
410 fatty acids and catalase. Although the function of these peroxisomes needs to be clarified, the  
411 set of predicted enzymes suggested significant metabolic diversity between the two amoebae  
412 as well as from their aerobic counterparts.

413

414

## 415 **Materials and methods**

### 416 **Cell culture**

417 Polyxenic (and polyeukaryotic) culture of *Pelomyxa schiedti* strain SKADARSKE was maintained  
418 in Sonneborn's *Paramecium* medium [59] as described previously [27].

419

### 420 **Genome and transcriptome sequencing and assembly**

421 Genome sequencing was performed from whole genome amplified DNA (WGA). Individual cells  
422 were picked by micromanipulation and washed twice in Trager U media [60]. Genomic DNA was  
423 amplified using Illustra Single Cell GenomiPhi DNA Amplification Kit (GE Healthcare Life  
424 Sciences) according to the manufacturer's protocol and purified using ethanol precipitation.  
425 Presence of the eukaryotic DNA was confirmed by amplification of a partial actin gene using  
426 specific primers (S4 Table). Sequencing libraries from seven positive samples were prepared  
427 using Illumina TruSeq DNA PCR-Free kit (Illumina). Samples Pello2 and Pello5 were sequenced on  
428 Illumina MiSeq (2x300 bp; Genomic Core facility, Faculty of Science) and Nanopore (Oxford  
429 Nanopore Technologies), samples P1 – P5 on Illumina HiSeq X (Macrogen Inc.). The Nanopore  
430 library was prepared using Oxford Nanopore Technologies ligation sequencing kit (SQK-LSK108)  
431 from 4 µg of T7 endonuclease I (New England Biolabs) treated WGA. Sequencing was  
432 performed using a R9.4.1 Spot-On Flow cell (FLO-MIN106) for 48 hours.

433 For transcriptome sequencing, single-cells of *P. schiedti* were washed twice in Trager U  
434 and amplification by 19 cycles was performed [61]. Five libraries were prepared using Nextera  
435 XT DNA Library preparation Kit (Illumina) and sequenced on Illumina MiSeq (PE 2x300bp;  
436 Genomic Core facility, Faculty of Science).

437 Raw Illumina DNA- and RNA-Seq reads were quality and adapter trimmed using BBduk  
438 v36.92 (part of BBTools suite: <https://jgi.doe.gov/data-and-tools/bbtools/>). Firstly, individual  
439 single-cell genome assemblies for Pel02, Pel05, and P1 – P5 were generated with SPAdes  
440 v3.11.1 [62] using single-cell (--sc) mode and a k-mer size of 127. As the 18S rDNAs extracted  
441 from individual assemblies were identical, all reads (i.e., Illumina HiSeqs and MiSeq, and  
442 Nanopore) were assembled together by SPAdes v3.11.1 using --sc and k-mers of 21, 33, 55, 77,  
443 99, 121. The resulting assembly was binned and decontaminated using tetraESOM [63] and a  
444 BLASTing strategy described previously [64]. The final assembly was scaffolded using  
445 P\_RNA\_scaffolder [65]. Prediction was done using Augustus v3.3.1 [66], and further improved  
446 by PASA and EVM [67] using the transcriptomic data. RNA-Seq reads were assembled using  
447 Trinity v2.6.5 [68] with default parameters, and contaminants were removed by BLASTing  
448 against the decontaminated genome assembly. RNA-Seq reads were mapped to the  
449 transcriptome using Bowtie2 v2.3.0 [69] and to the genome using HISAT2 v2.0.5 [70]. Genome  
450 and transcriptome completeness were assessed using BUSCO v3 with the eukaryota\_odb9  
451 dataset [71].

452

### 453 **Sequence searches and localization predictions**

454 Proteins predicted to localize in *M. balamuthi* hydrogenosome, *E. histolytica* mitosome, and *A.*  
455 *castellanii* mitochondria served as queries in BLAST v2.6.0+ [72] searches through *P. schiedti*  
456 assemblies. Sensitive searches for components of TOM/TIM machinery were done using  
457 HMMER v3.3 [73]. Protein domains were predicted by InterProScan [74] implemented in  
458 Geneious Prime v2020.2.3 [75].

459 Potentially mitochondrion-targeted proteins were identified using TargetP v2 [76],  
460 PSORT II [77], MultiLoc2 [78], and NommPred [79] tools. Since *P. schiedti* does not harbor  
461 plastid, the plant setting from MultiLoc2 was omitted and NommPred was used in the MRO and  
462 in the *Dictyostelium* settings [19]. A protein was considered as mitochondrial if predicted by at  
463 least one setting of MultiLoc2 or NommPred.

464 Peroxins were identified by BLAST searches using *M. balamuthi* queries. Peroxisomal  
465 matrix proteins were predicted by searching for peroxisomal targeting signals (PTS). The  
466 tripeptides SRI and [SAP][KR][LM] (excluding AKM, PKM, and PRM) were used to search for the  
467 C-terminal PTS1. Proline at position -3 and methionine at position -1 were included based on  
468 experimental verification in *M. balamuthi* [17]. Two nanopeptides R[LI](x5)HL were used for N-  
469 terminal PTS2 searches [80]. All putative transmembrane proteins determined by TMHMM  
470 Server v2.0 [81] were filtered out. PTS1 candidates were submitted to the PTS1 Predictor using  
471 GENERAL function [82] evaluating twelve C-terminal residues.

472

### 473 **Phylogenetic analyses**

474 An 18S rRNA gene dataset was aligned by MAFFT v7 [83] server with the G-INS-i algorithm at  
475 default settings and manually edited in BioEdit v7.0.4.1 [84] resolving 1,437 positions.  
476 Phylogenetic tree was constructed using Maximum-Likelihood in RAxML v8.0.0 [85] under the  
477 GTRGAMMAI model, 100 starting trees, and 1,000 bootstrap pseudoreplicates.

478 For selected proteins, datasets were aligned by MAFFT v7.313 [83], trimmed by trimAl  
479 v1.4 [86] and Maximum-Likelihood trees were inferred by IQ-TREE v1.6.8 [87] using the

480 posterior mean site frequency method [88], LG+C20+F+G model, with the guide tree inferred  
481 under LG+F+G. Branch supports were obtained by the ultrafast bootstrap approximation [89].

482

### 483 **Immunofluorescence analysis**

484 NifS genes (Pelo6206 and Pelo13211) were amplified from cDNA using specific primers (S4  
485 Table) and PrimeSTAR® Max DNA Polymerase (Takara Bio Inc.) premix, cloned into pUG35  
486 vector containing C-terminal green fluorescence protein (GFP), and transformed to *S. cerevisiae*  
487 strain YPH499 using the lithium acetate method [90]. Transformants were grown on selective  
488 medium without uracil (SD-URA) at 30 °C. For localization, transformed cells were incubated  
489 with MitoTracker Red CMXRos (1:10,000; Thermo Fisher Scientific) for 10 minutes, followed by  
490 two washes with PBS, and mounted in 1% low-melting agarose and imaged using a Leica SP8  
491 confocal microscope. Deconvolution was performed using Huygens Professional v17.10 and  
492 ImageJ v1.50b.

493

### 494 **Transmission electron microscopy**

495 A grown culture of *P. schiedti* was pelleted by centrifugation and fixed one hour on ice with  
496 2.5% glutaraldehyde in 0.1 M cacodylate buffer (pH 7.2). After washing in 0.1 M cacodylate  
497 buffer, the cells were postfixed one hour on ice with 1% OsO<sub>4</sub>. After washing with distilled  
498 water, the fixed cells were dehydrated in a graded series of ethanol, transferred to acetone,  
499 and embedded in EPON resin. Ultrathin sections were prepared on an ultramicrotome  
500 (Reichert-Jung Ultracut E) with a diamond knife. Sections were stained with uranyl acetate and  
501 lead citrate and examined using JEOL 1011 transmission electron microscope.

502

503

## 504 **Data availability**

505 The raw sequencing data are available at NCBI (<https://www.ncbi.nlm.nih.gov/>) as BioProject

506 PRJNA672820. Final assemblies are available from Zenodo at

507 [https://zenodo.org/record/4733726#.Yl\\_RPWYza3l](https://zenodo.org/record/4733726#.Yl_RPWYza3l).

508

## 509 **Author contributions**

510 SCT cultured cells, prepared sequencing libraries, and performed Nanopore sequencing. KZ and

511 SCT assembled genome and transcriptome, and predicted proteins. IČ provided the culture of *P.*

512 *schiedti* and conducted 18S rDNA phylogeny. KZ performed most of the bioinformatic and

513 phylogenetic analyses. KZ, IŠ-S, JT, and VH analyzed the metabolism of the mitochondrion-

514 related organelle. TL and JT analyzed the peroxisomal metabolism. PH performed the

515 microscopic observations. JT and VH supervised the project. KZ, JT, and VH wrote the

516 manuscript. All authors contributed to the editing of the final manuscript.

517

## 518 **Acknowledgements**

519 We thank Dr. Zoltán Füßy (Charles University, BIOCEV, Prague, Czech Republic) and Dr.

520 Courtney W. Stairs (Lund University, Lund, Sweden) for helpful discussions and advice.

521

## 522 **Funding**



523 This project has received funding from the European Research Council (ERC) under the  
524 European Union's Horizon 2020 research and innovation programme (grant agreement No.  
525 771592) and from Ministry of Education, Youth and Sports (MEYS) of Czech Republic (CR) in  
526 Centre for research of pathogenicity and virulence of parasites (project No.  
527 CZ.02.1.01/0.0/0.0/16\_019/0000759). We acknowledge Imaging Methods Core Facility at  
528 BIOCEV, supported by the MEYS CR (Large RI Project LM2018129 Czech-Biolmaging) and ERDF  
529 (project No. CZ.02.1.01/0.0/0.0/16\_013/0001775 and CZ.02.1.01/0.0/0.0/18\_046/0016045) for  
530 their support with obtaining imaging data. Computational resources were supplied by the  
531 project "e-Infrastruktura CZ" (e-INFRA LM2018140) provided within the program Projects of  
532 Large Research, Development and Innovations Infrastructures.

533

### 534 **Competing interests**

535 The authors declared no competing interests.

536

537

### 538 **References**

- 539 1. Müller M, Mentel M, van Hellemond JJ, Henze K, Woehle C, Gould SB, et al. Biochemistry  
540 and evolution of anaerobic energy metabolism in eukaryotes. *Microbiol Mol Biol Rev.*  
541 2012;76: 444–495.
- 542 2. Roger AJ, Muñoz-Gómez SA, Kamikawa R. The origin and diversification of mitochondria.  
543 *Curr Biol.* 2017;27: R1177–R1192.
- 544 3. Gawryluk RMR, Stairs CW. Diversity of electron transport chains in anaerobic protists.

- 545 Biochim Biophys Acta - Bioenerg. 2021;1862: 148334.
- 546 4. Zaremba-Niedzwiedzka K, Caceres EF, Saw JH, Bäckström Di, Juzokaite L, Vancaester E, et  
547 al. Asgard archaea illuminate the origin of eukaryotic cellular complexity. Nature.  
548 2017;541: 353–358.
- 549 5. Sagan L. On the origin of mitosing cells. J Theor Biol. 1967;14: 255–274.
- 550 6. Martijn J, Vosseberg J, Guy L, Offre P, Ettema TJG. Deep mitochondrial origin outside the  
551 sampled alphaproteobacteria. Nature. 2018;557: 101–105.
- 552 7. Gawryluk RMR, Kamikawa R, Stairs CW, Silberman JD, Brown MW, Roger AJ. The earliest  
553 stages of mitochondrial adaptation to low oxygen revealed in a novel rhizarian. Curr Biol.  
554 2016;26: 2729–2738.
- 555 8. Leger MM, Kolisko M, Kamikawa R, Stairs CW, Kume K, Čepička I, et al. Organelles that  
556 illuminate the origins of *Trichomonas hydrogenosomes* and *Giardia mitosomes*. Nat Ecol  
557 Evol. 2017;1: 0092.
- 558 9. Karnkowska A, Vacek V, Zubáčová Z, Treitli SC, Petrželková R, Eme L, et al. A eukaryote  
559 without a mitochondrial organelle. Curr Biol. 2016;26: 1274–1284.
- 560 10. Panigrahi AK, Ogata Y, Zíková A, Anupama A, Dalley RA, Acestor N, et al. A  
561 comprehensive analysis of *Trypanosoma brucei* mitochondrial proteome. Proteomics.  
562 2009;9: 434–450.
- 563 11. Lee CP, Taylor NL, Harvey Millar A. Recent advances in the composition and  
564 heterogeneity of the *Arabidopsis* mitochondrial proteome. Front Plant Sci. 2013;4: 4.
- 565 12. Gawryluk RMR, Chisholm KA, Pinto DM, Gray MW. Compositional complexity of the  
566 mitochondrial proteome of a unicellular eukaryote (*Acanthamoeba castellanii*,

- 567 supergroup Amoebozoa) rivals that of animals, fungi, and plants. *J Proteomics*. 2014;109:  
568 400–416.
- 569 13. Žárský V, Tachezy J. Evolutionary loss of peroxisomes - not limited to parasites. *Biol*  
570 *Direct*. 2015;10: 74.
- 571 14. Schlüter A, Fourcade S, Ripp R, Mandel JL, Poch O, Pujol A. The evolutionary origin of  
572 peroxisomes: An ER-peroxisome connection. *Mol Biol Evol*. 2006;23: 838–845.
- 573 15. Gabaldón T. Peroxisome diversity and evolution. *Philos Trans R Soc B Biol Sci*. 2010;365:  
574 765–773.
- 575 16. Gabaldón T, Ginger ML, Michels PAM. Peroxisomes in parasitic protists. *Mol Biochem*  
576 *Parasitol*. 2016;209: 35–45.
- 577 17. Le T, Žárský V, Nývltová E, Rada P, Harant K, Vancová M, et al. Anaerobic peroxisomes in  
578 *Mastigamoeba balamuthi*. *Proc Natl Acad Sci U S A*. 2020;117: 2065–2075.
- 579 18. Pánek T, Zadrobílková E, Walker G, Brown MW, Gentekaki E, Hroudová M, et al. First  
580 multigene analysis of Archamoebae (Amoebozoa: Conosa) robustly reveals its phylogeny  
581 and shows that Entamoebidae represents a deep lineage of the group. *Mol Phylogenet*  
582 *Evol*. 2016;98: 41–51.
- 583 19. Kang S, Tice AK, Spiegel FW, Silberman JD, Pánek T, Cepicka I, et al. Between a pod and a  
584 hard test: The deep evolution of Amoebae. *Mol Biol Evol*. 2017;34: 2258–2270.
- 585 20. Pearce XG, Annesley SJ, Fisher PR. The *Dictyostelium* model for mitochondrial biology  
586 and disease. *Int J Dev Biol*. 2019;63: 497–508.
- 587 21. Leger MM, Gawryluk RMR, Gray MW, Roger AJ. Evidence for a hydrogenosomal-type  
588 anaerobic ATP generation pathway in *Acanthamoeba castellanii*. *PLoS One*. 2013;8:

- 589 e69532.
- 590 22. Mi-ichi F, Yousuf MA, Nakada-Tsukui K, Nozaki T. Mitosomes in *Entamoeba histolytica*  
591 contain a sulfate activation pathway. *Proc Natl Acad Sci*. 2009;106: 21731–21736.
- 592 23. Gill EE, Diaz-Triviño S, Barberà MJ, Silberman JD, Stechmann A, Gaston D, et al. Novel  
593 mitochondrion-related organelles in the anaerobic amoeba *Mastigamoeba balamuthi*.  
594 *Mol Microbiol*. 2007;66: 1306–1320.
- 595 24. Nývltová E, Stairs CW, Hrdý I, Rídl J, Mach J, Pačes J, et al. Lateral gene transfer and gene  
596 duplication played a key role in the evolution of *Mastigamoeba balamuthi*  
597 hydrogenosomes. *Mol Biol Evol*. 2015/01/07. 2015;32: 1039–1055.
- 598 25. Nývltová E, Šuták R, Harant K, Šedinová M, Hrdý I, Pačes J, et al. NIF-type iron-sulfur  
599 cluster assembly system is duplicated and distributed in the mitochondria and cytosol of  
600 *Mastigamoeba balamuthi*. *Proc Natl Acad Sci U S A*. 2013;110: 7371–7376.
- 601 26. Seravin L, Goodkov A. Cytoplasmic microbody-like granules of the amoeba *Pelomyxa*  
602 *palustris*. *Tsitologiya*. 1987;29: 600–603.
- 603 27. Zadrobílková E, Walker G, Čepička I. Morphological and molecular evidence support a  
604 close relationship between the free-living Archamoebae *Mastigella* and *Pelomyxa*.  
605 *Protist*. 2015;166: 14–41.
- 606 28. Žárský V, Klimeš V, Pačes J, Vlček Č, Hradilová M, Beneš V, et al. The *Mastigamoeba*  
607 *balamuthi* genome and the nature of the free-living ancestor of *Entamoeba*. *Mol Biol*  
608 *Evol*. 2021;msab020: .
- 609 29. Wang D, Hancock J. IntronDB: A database for eukaryotic intron features. *Bioinformatics*.  
610 2019;35: 4400–4401.

- 611 30. Dolezal P, Dagley MJ, Kono M, Woly nec P, Likić VA, Foo JH, et al. The essentials of protein  
612 import in the degenerate mitochondrion of *Entamoeba histolytica*. PLoS Pathog. 2010;6:  
613 e1000812.
- 614 31. Schneider A. Evolution of mitochondrial protein import - Lessons from trypanosomes.  
615 Biol Chem. 2020;401: 663–676.
- 616 32. Makki A, Rada P, Žárský V, Kereiče S, Kováčik L, Novotný M, et al. Triplet-pore structure  
617 of a highly divergent TOM complex of hydrogenosomes in *Trichomonas vaginalis*. PLoS  
618 Biol. 2019;17: e3000098.
- 619 33. Hao H-X, Khalimonchuk O, Schraders M, Dephoure N, Bayley J-P, Kunst H, et al. SDH5, a  
620 gene required for flavination of succinate dehydrogenase, is mutated in paraganglioma.  
621 Science. 2009;325: 1139–1142.
- 622 34. Stairs CW, Eme L, Muñoz-Gómez SA, Cohen A, Dellaire G, Shepherd JN, et al. Microbial  
623 eukaryotes have adapted to hypoxia by horizontal acquisitions of a gene involved in  
624 rhodoquinone biosynthesis. Elife. 2018;7: e34292.
- 625 35. Castro-Guerrero NA, Jasso-Chávez R, Moreno-Sánchez R. Physiological role of  
626 rhodoquinone in *Euglena gracilis* mitochondria. Biochim Biophys Acta. 2005;1710: 113–  
627 121.
- 628 36. Coustou V, Besteiro S, Rivière L, Biran M, Biteau N, Franconi JM, et al. A mitochondrial  
629 NADH-dependent fumarate reductase involved in the production of succinate excreted  
630 by procyclic *Trypanosoma brucei*. J Biol Chem. 2005;280: 16559–16570.
- 631 37. Jitrapakdee S, St Maurice M, Rayment I, Cleland WW, Wallace JC, Attwood P V. Structure,  
632 mechanism and regulation of pyruvate carboxylase. Biochem J. 2008;413: 369–387.

- 633 38. Leger MM, Eme L, Hug LA, Roger AJ. Novel hydrogenosomes in the microaerophilic  
634 jakobid *Stygiella incarcerata*. Mol Biol Evol. 2016/06/08. 2016;33: 2318–2336.
- 635 39. Kikuchi G. The glycine cleavage system: composition, reaction mechanism, and  
636 physiological significance. Mol Cell Biochem. 1973;1: 169–187.
- 637 40. Dale RA. Catabolism of threonine in mammals by coupling of L-threonine 3-  
638 dehydrogenase with 2-amino-3-oxobutyrate-CoA ligase. Biochim Biophys Acta. 1978;544:  
639 496–503.
- 640 41. Schertl P, Braun H-P. Respiratory electron transfer pathways in plant mitochondria. Front  
641 Plant Sci. 2014;5: 163.
- 642 42. Thomson JM, Gaucher EA, Burgan MF, De Kee DW, Li T, Aris JP, et al. Resurrecting  
643 ancestral alcohol dehydrogenases from yeast. Nat Genet. 2005;37: 630–635.
- 644 43. Hügler M, Wirsen CO, Fuchs G, Taylor CD, Sievert SM. Evidence for autotrophic CO<sub>2</sub>  
645 fixation via the reductive tricarboxylic acid cycle by members of the  $\epsilon$  subdivision of  
646 proteobacteria. J Bacteriol. 2005;187: 3020–3027.
- 647 44. Jiang L, Boufersaoui A, Yang C, Ko B, Rakheja D, Guevara G, et al. Quantitative metabolic  
648 flux analysis reveals an unconventional pathway of fatty acid synthesis in cancer cells  
649 deficient for the mitochondrial citrate transport protein. Metab Eng. 2017;43: 198–207.
- 650 45. Verschueren KHG, Blanchet C, Felix J, Dansercoer A, De Vos D, Bloch Y, et al. Structure of  
651 ATP citrate lyase and the origin of citrate synthase in the Krebs cycle. Nature. 2019;568:  
652 571–575.
- 653 46. Taylor EB. Functional properties of the mitochondrial carrier system. Trends Cell Biol.  
654 2017;27: 633–644.

- 655 47. Jackson JB, Peake SJ, White SA. Structure and mechanism of proton-translocating  
656 transhydrogenase. *FEBS Lett.* 1999;464: 1–8.
- 657 48. Yu Y, Samuelson J. Primary structure of an *Entamoeba histolytica* nicotinamide  
658 nucleotide transhydrogenase. *Mol Biochem Parasitol.* 1994;68: 323–328.
- 659 49. Yousuf MA, Mi-ichi F, Nakada-Tsukui K, Nozaki T. Localization and targeting of an unusual  
660 pyridine nucleotide transhydrogenase in *Entamoeba histolytica*. *Eukaryot Cell.*  
661 2010/04/09. 2010;9: 926–933.
- 662 50. Kuchenreuther JM, Britt RD, Swartz JR. New insights into [FeFe] hydrogenase activation  
663 and maturase function. *PLoS One.* 2012;7: e45850.
- 664 51. Tachezy J, Doležal P. Iron–sulfur proteins and iron–sulfur cluster assembly in organisms  
665 with hydrogenosomes and mitosomes. In: Martin WF, Müller M, editors. *Origin of*  
666 *Mitochondria and Hydrogenosomes.* Berlin, Heidelberg: Springer Berlin Heidelberg;  
667 2007. pp. 105–133.
- 668 52. Stairs CW, Eme L, Brown MW, Mutsaers C, Susko E, Dellaire G, et al. A SUF Fe-S cluster  
669 biogenesis system in the mitochondrion-related organelles of the anaerobic protist  
670 *Pygsoia*. *Curr Biol.* 2014;24: 1176–1186.
- 671 53. Thomé R, Gust A, Toci R, Mendel R, Bittner F, Magalon A, et al. A sulfurtransferase is  
672 essential for activity of formate dehydrogenases in *Escherichia coli*. *J Biol Chem.*  
673 2012;287: 4671–4678.
- 674 54. Mansy SS, Wu G, Surerus KK, Cowan JA. Iron-sulfur cluster biosynthesis. *Thermatoga*  
675 *maritima* IscU is a structured iron-sulfur cluster assembly protein. *J Biol Chem.* 2002;277:  
676 21397–21404.

- 677 55. Kaiser JT, Clausen T, Bourenkow GP, Bartunik HD, Steinbacher S, Huber R. Crystal  
678 structure of a NifS-like protein from *Thermotoga maritima*: implications for iron sulphur  
679 cluster assembly. *J Mol Biol.* 2000;297: 451–464.
- 680 56. Mi-ichi F, Makiuchi T, Furukawa A, Sato D, Nozaki T. Sulfate activation in mitosomes plays  
681 an important role in the proliferation of *Entamoeba histolytica*. *PLoS Negl Trop Dis.*  
682 2011;5: e1263.
- 683 57. Mi-ichi F, Nozawa A, Yoshida H, Tozawa Y, Nozaki T. Evidence that the *Entamoeba*  
684 *histolytica* mitochondrial carrier family links mitosomal and cytosolic pathways through  
685 exchange of 3'-phosphoadenosine 5'-phosphosulfate and ATP. *Eukaryot Cell.* 2015;14:  
686 1144–1150.
- 687 58. Liu S, He L, Yao K. The antioxidative function of alpha-ketoglutarate and its applications.  
688 *Biomed Res Int.* 2018;2018: 3408467.
- 689 59. Sonneborn TM. Methods in the general biology and genetics of *Paramecium aurelia*. *J*  
690 *Exp Zool.* 1950;113: 87–147.
- 691 60. Trager W. The cultivation of a cellulose-digesting flagellate, *Trichomonas termopsisidis*,  
692 and of certain other termite protozoa. *Biol Bull.* 1934;66: 182–190.
- 693 61. Picelli S, Faridani OR, Björklund AK, Winberg G, Sagasser S, Sandberg R. Full-length RNA-  
694 seq from single cells using Smart-seq2. *Nat Protoc.* 2014;9: 171–181.
- 695 62. Bankevich A, Nurk S, Antipov D, Gurevich AA, Dvorkin M, Kulikov AS, et al. SPAdes: a new  
696 genome assembly algorithm and its applications to single-cell sequencing. *J Comput Biol.*  
697 2012/04/16. 2012;19: 455–477.
- 698 63. Dick GJ, Andersson AF, Baker BJ, Simmons SL, Thomas BC, Yelton AP, et al. Community-



- 699 wide analysis of microbial genome sequence signatures. *Genome Biol.* 2009/08/21.  
700 2009;10: R85–R85.
- 701 64. Treitli SC, Kolisko M, Husník F, Keeling PJ, Hampl V. Revealing the metabolic capacity of  
702 *Streblomastix strix* and its bacterial symbionts using single-cell metagenomics. *Proc Natl*  
703 *Acad Sci U S A.* 2019;116: 19675–19684.
- 704 65. Zhu B-H, Xiao J, Xue W, Xu G-C, Sun M-Y, Li J-T. P\_RNA\_scaffolder: a fast and accurate  
705 genome scaffolder using paired-end RNA-sequencing reads. *BMC Genomics.* 2018;19:  
706 175.
- 707 66. Stanke M, Schöffmann O, Morgenstern B, Waack S. Gene prediction in eukaryotes with a  
708 generalized hidden Markov model that uses hints from external sources. *BMC*  
709 *Bioinformatics.* 2006;7: 62.
- 710 67. Haas BJ, Salzberg SL, Zhu W, Pertea M, Allen JE, Orvis J, et al. Automated eukaryotic gene  
711 structure annotation using EvidenceModeler and the Program to Assemble Spliced  
712 Alignments. *Genome Biol.* 2008;9: R7–R7.
- 713 68. Grabherr MG, Haas BJ, Yassour M, Levin JZ, Thompson DA, Amit I, et al. Full-length  
714 transcriptome assembly from RNA-Seq data without a reference genome. *Nat*  
715 *Biotechnol.* 2011/05/17. 2011;29: 644–652.
- 716 69. Langmead B, Salzberg SL. Fast gapped-read alignment with Bowtie 2. *Nat Methods.*  
717 2012/03/06. 2012;9: 357–359.
- 718 70. Kim D, Paggi JM, Park C, Bennett C, Salzberg SL. Graph-based genome alignment and  
719 genotyping with HISAT2 and HISAT-genotype. *Nat Biotechnol.* 2019;37: 907–915.
- 720 71. Simão FA, Waterhouse RM, Ioannidis P, Kriventseva E V, Zdobnov EM. BUSCO: assessing

- 721 genome assembly and annotation completeness with single-copy orthologs.  
722 Bioinformatics. 2015/06/11. 2015;31: 3210–3212.
- 723 72. Altschul SF, Gish W, Miller W, Myers EW, Lipman DJ. Basic local alignment search tool. J  
724 Mol Biol. 1990;215: 403–410.
- 725 73. Eddy SR. A new generation of homology search tools based on probabilistic inference.  
726 Genome Inf. 2010/02/25. 2009;23: 205–211.
- 727 74. Jones P, Binns D, Chang HY, Fraser M, Li W, McAnulla C, et al. InterProScan 5: genome-  
728 scale protein function classification. Bioinformatics. 2014/01/24. 2014;30: 1236–1240.
- 729 75. Kearse M, Moir R, Wilson A, Stones-Havas S, Cheung M, Sturrock S, et al. Geneious Basic:  
730 an integrated and extendable desktop software platform for the organization and  
731 analysis of sequence data. Bioinformatics. 2012/05/01. 2012;28: 1647–1649.
- 732 76. Almagro Armenteros JJ, Salvatore M, Emanuelsson O, Winther O, von Heijne G, Elofsson  
733 A, et al. Detecting sequence signals in targeting peptides using deep learning. Life Sci  
734 Alliance. 2019;2: e201900429.
- 735 77. Horton P, Nakai K. Better prediction of protein cellular localization sites with the k  
736 nearest neighbors classifier. Proc Int Conf Intell Syst Mol Biol. 1997;5: 147–152.
- 737 78. Blum T, Briesemeister S, Kohlbacher O. MultiLoc2: Integrating phylogeny and gene  
738 ontology terms improves subcellular protein localization prediction. BMC Bioinformatics.  
739 2009/09/03. 2009;10: 274.
- 740 79. Kume K, Amagasa T, Hashimoto T, Kitagawa H. NommPred: Prediction of mitochondrial  
741 and mitochondrion-related organelle proteins of nonmodel organisms. Evol Bioinform  
742 Online. 2018;14: 1176934318819835.

- 743 80. Reumann S. Specification of the peroxisome targeting signals type 1 and type 2 of plant  
744 peroxisomes by bioinformatics analyses. *Plant Physiol.* 2004;135: 783–800.
- 745 81. Krogh A, Larsson B, von Heijne G, Sonnhammer EL. Predicting transmembrane protein  
746 topology with a hidden Markov model: application to complete genomes. *J Mol Biol.*  
747 2001/01/12. 2001;305: 567–580.
- 748 82. Neuberger G, Maurer-Stroh S, Eisenhaber B, Hartig A, Eisenhaber F. Prediction of  
749 peroxisomal targeting signal 1 containing proteins from amino acid sequence. *J Mol Biol.*  
750 2003;328: 581–592.
- 751 83. Katoh K, Standley DM. MAFFT multiple sequence alignment software version 7:  
752 improvements in performance and usability. *Mol Biol Evol.* 2013/01/19. 2013;30: 772–  
753 780.
- 754 84. Hall TA. BioEdit: a user-friendly biological sequence alignment editor and analysis  
755 program for Windows 95/98/ NT. *Nucleic Acids Symp Ser.* 1999;41: 95–98.
- 756 85. Stamatakis A. RAxML version 8: A tool for phylogenetic analysis and post-analysis of large  
757 phylogenies. *Bioinformatics.* 2014;30: 1312–1313.
- 758 86. Capella-Gutiérrez S, Silla-Martínez JM, Gabaldón T. trimAl: a tool for automated  
759 alignment trimming in large-scale phylogenetic analyses. *Bioinformatics.* 2009/06/10.  
760 2009;25: 1972–1973.
- 761 87. Nguyen LT, Schmidt HA, von Haeseler A, Minh BQ. IQ-TREE: a fast and effective stochastic  
762 algorithm for estimating maximum-likelihood phylogenies. *Mol Biol Evol.* 2014/11/06.  
763 2015;32: 268–274.
- 764 88. Wang H-C, Minh BQ, Susko E, Roger AJ. Modeling site heterogeneity with posterior mean

765 site frequency profiles accelerates accurate phylogenomic estimation. *Syst Biol.* 2018;67:  
766 216–235.

767 89. Hoang DT, Chernomor O, von Haeseler A, Minh BQ, Vinh LS. UFBoot2: Improving the  
768 ultrafast bootstrap approximation. *Mol Biol Evol.* 2017;35: 518–522.

769 90. Gietz RD, Woods RA. Yeast transformation by the LiAc/SS Carrier DNA/PEG method. In:  
770 Xiao W, editor. *Yeast Protocols*. Totowa, NJ: Humana Press; 2006. pp. 107–120.

771

772

### 773 **Supporting information**

774 **S1 Fig. Phylogenetic analysis of amoebozoan 18S rDNA.** The Maximum Likelihood tree places  
775 *Pelomyxa schiedti* in monophyletic Pelomyxidae group inside monophyletic Archamoebae.  
776 Standard bootstrap support values are shown when  $\geq 50\%$ .

777

778 **S2 Fig. BUSCO analysis of the *Pelomyxa schiedti* transcriptome and predicted proteins.**  
779 Completeness of *P. schiedti* datasets were assessed using the odb9\_eukaryota dataset and  
780 compared with completeness of predicted proteins from *Mastigamoeba balamuthi*.

781

782 **S3 Fig. Phylogenetic analysis of HSP70 proteins.** The Maximum Likelihood phylogenetic tree  
783 documents that one of the *Pelomyxa schiedti* HSP70 sequence is related to mitochondrial  
784 orthologues from other eukaryotes. Ultrafast bootstrap support values are shown when  $\geq 75\%$ .

785

786 **S4 Fig. Phylogenetic analysis of PFO enzymes.** The Maximum Likelihood phylogenetic tree  
787 identified a PFO version putatively operating in *Pelomyxa schiedti* MRO. Hydrogenosomal PFO  
788 copies of *Mastigamoeba balamuthi* are marked with stars. Number in parenthesis shows  
789 number of species in the collapsed clade. Ultrafast bootstrap support values are shown when  $\geq$   
790 75%.

791  
792 **S5 Fig. Sequences of *Pelomyxa schiedti* components of NIF system.** (A) The diagram depicts *P.*  
793 *schiedti* protein Pelo10620 composed of a NifU N-terminal domain fused to a FdhD (formate  
794 dehydrogenase accessory sulfurtransferase) C-terminal domain as determined by InterProScan.  
795 (B-C) Sequence alignment of NifU (B) and NifS (C) proteins from *P. schiedti* and *Mastigamoeba*  
796 *balamuthi* in comparison with bacterial homologues from *Thermotoga maritima*. The amino  
797 acid residues necessary for the function of NifU and NifS are labeled according to the legend.

798  
799 **S6 Fig. Phylogenetic analysis of transporters involved in the sulfate activation pathway.** (A)  
800 The phylogenetic analysis did not resolve which one of the sodium/sulfate symporters of  
801 *Pelomyxa schiedti* is related to the *Entamoeba histolytica* mitochondrial transporter. (B) The  
802 Maximum Likelihood phylogenetic tree confirms one *P. schiedti* transporter as PAPS (3'-  
803 phosphoadenosine 5'-phosphosulfate) transporter, while two others belong to a broader  
804 mitochondrial carrier family of transporters. Experimentally proven mitochondrial transporters of  
805 *E. histolytica* are marked with stars. Ultrafast bootstrap support values are shown when  $\geq$  75%.

806

807 **S1 Table: Statistics of *Pelomyxa schiedti* assemblies** were compared with those of  
808 *Mastigamoeba balamuthi*.

809

810 **S2 Table: Proteins targeted to MRO of *Pelomyxa schiedti*.** Localization of proteins was  
811 predicted by several tools, as listed in columns E - J. Mitochondrial predictions are highlighted  
812 by white font on blue background. Column K shows final inferred prediction of localization. mit,  
813 mitochondrial; cyt, cytosolic; SP, signal peptide; ER, endoplasmic reticulum; nuc, nuclear;  
814 extracell, extracellular; sec, secretory system; perox, peroxisomal; PM, plasma membrane;  
815 Other, other localization; -, protein not localized in MRO; +, protein localized in MRO; +?,  
816 protein localized in MRO with low confidence.

817

818 **S3 Table. Proteins required for peroxisome biogenesis and targeted to peroxisome.** Proteins  
819 identified in *Mastigamoeba balamuthi* are highlighted by white font on blue background.  
820 Proteins were considered peroxisome-targeted, if they contained PTS1 (SRI or [SAP][KR][LM]) or  
821 PTS2 motif (R[LIV](x5)HL), and/or were predicted by PTS1 predictor [82].

822

823 **S4 Table: Primers used in this study.**

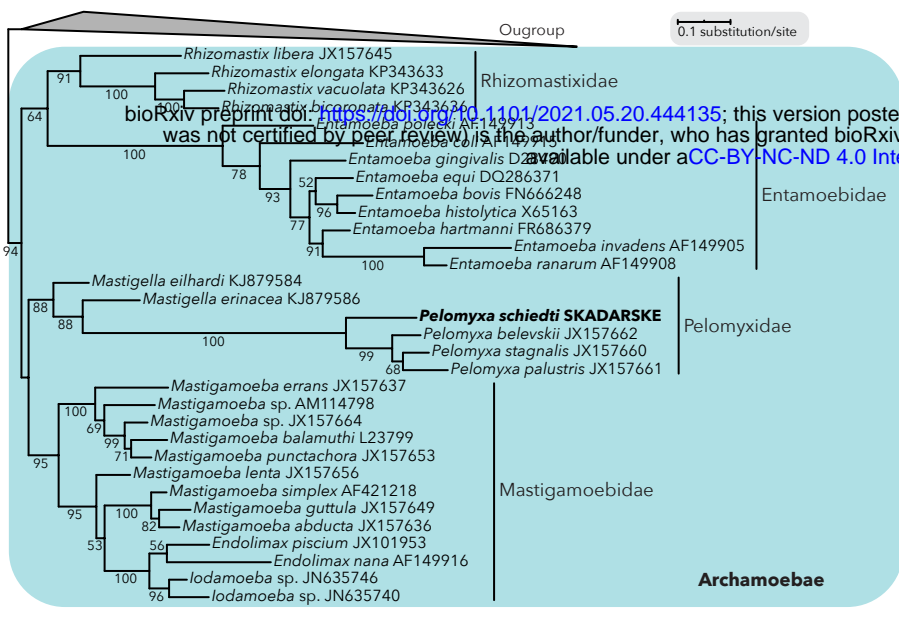

bioRxiv preprint doi: <https://doi.org/10.1101/2021.05.20.444135>; this version posted May 21, 2021. The copyright holder for this preprint (which was not certified by peer review) is the author/funder, who has granted bioRxiv a license to display the preprint in perpetuity. It is made available under aCC-BY-NC-ND 4.0 International license.

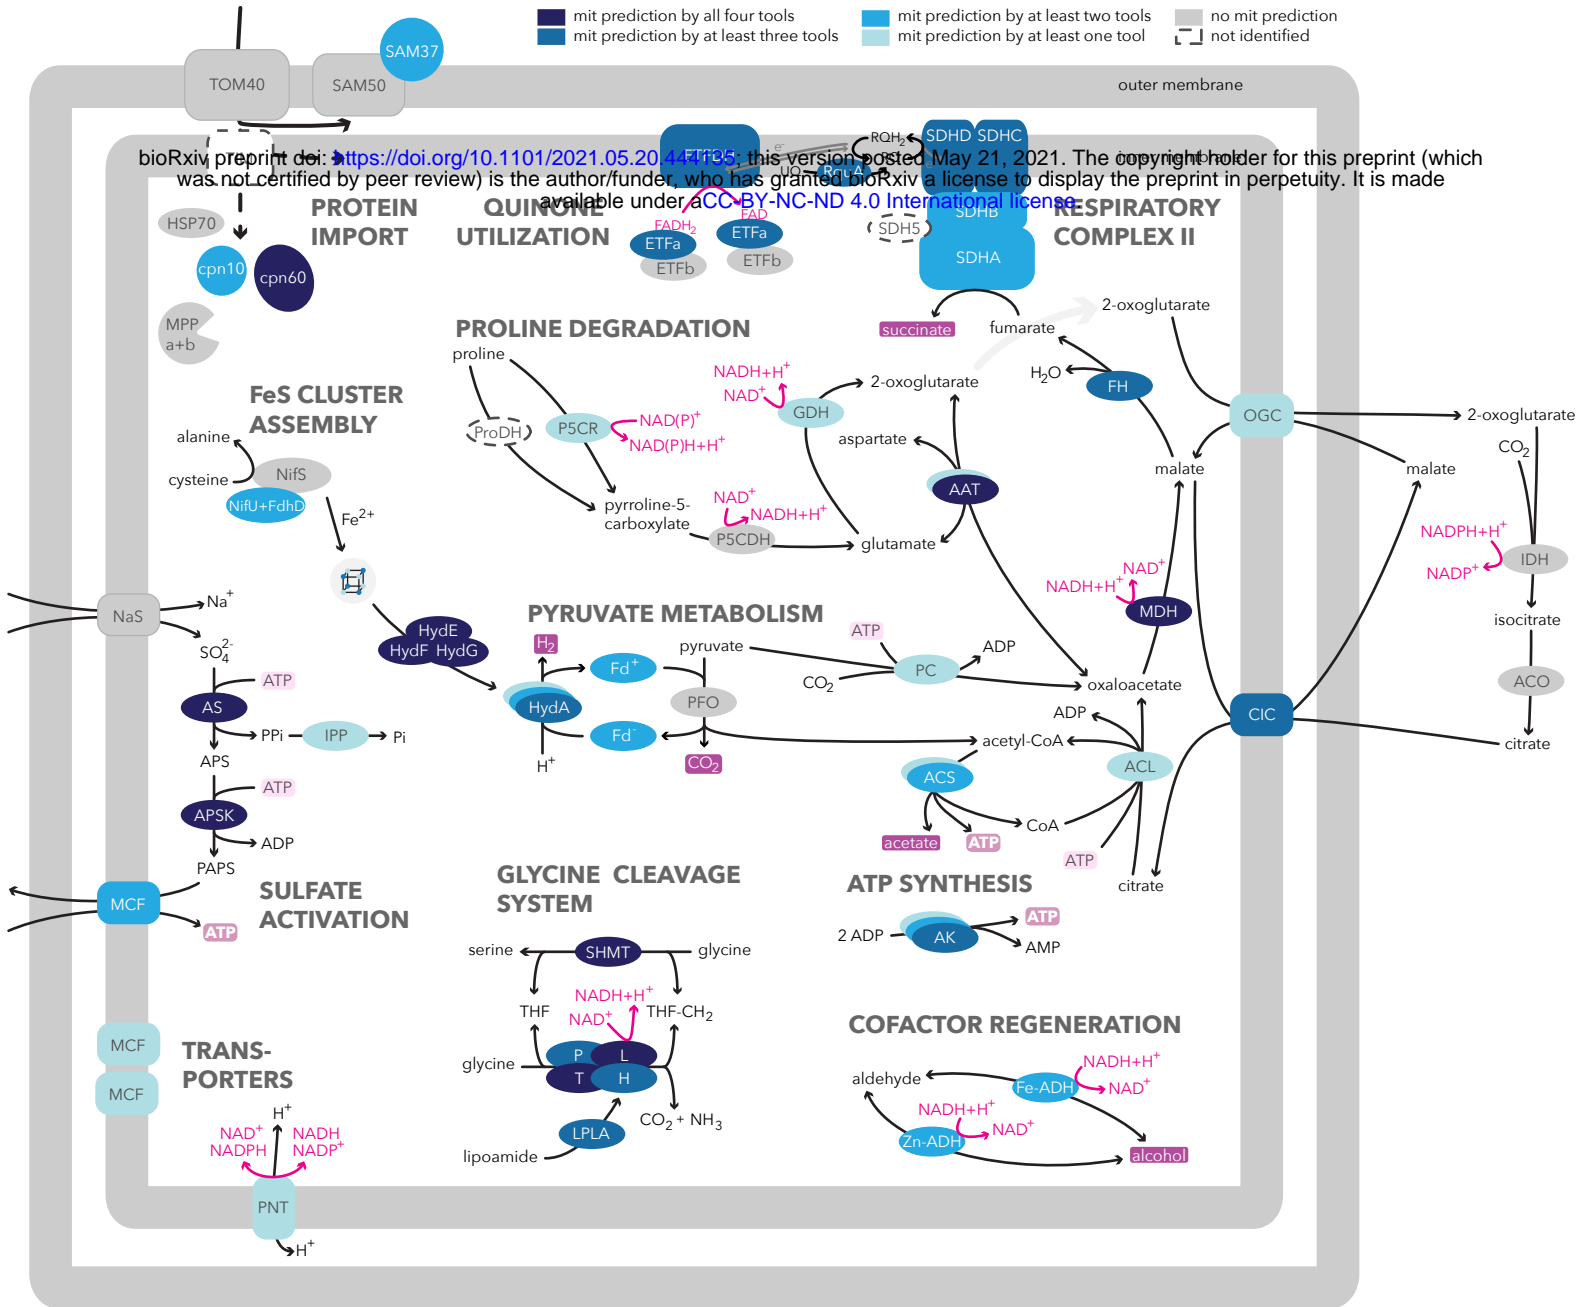



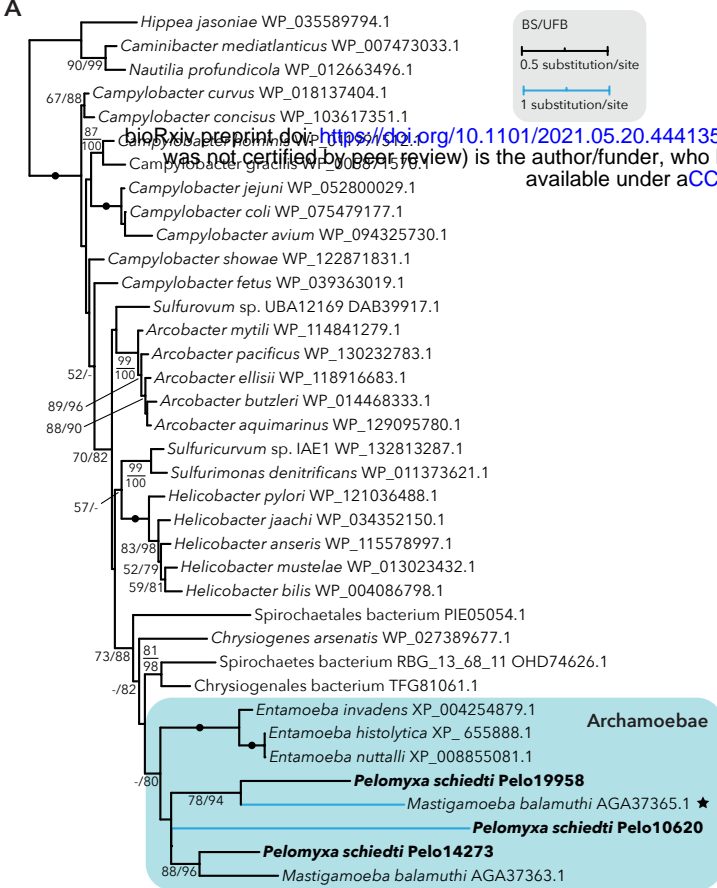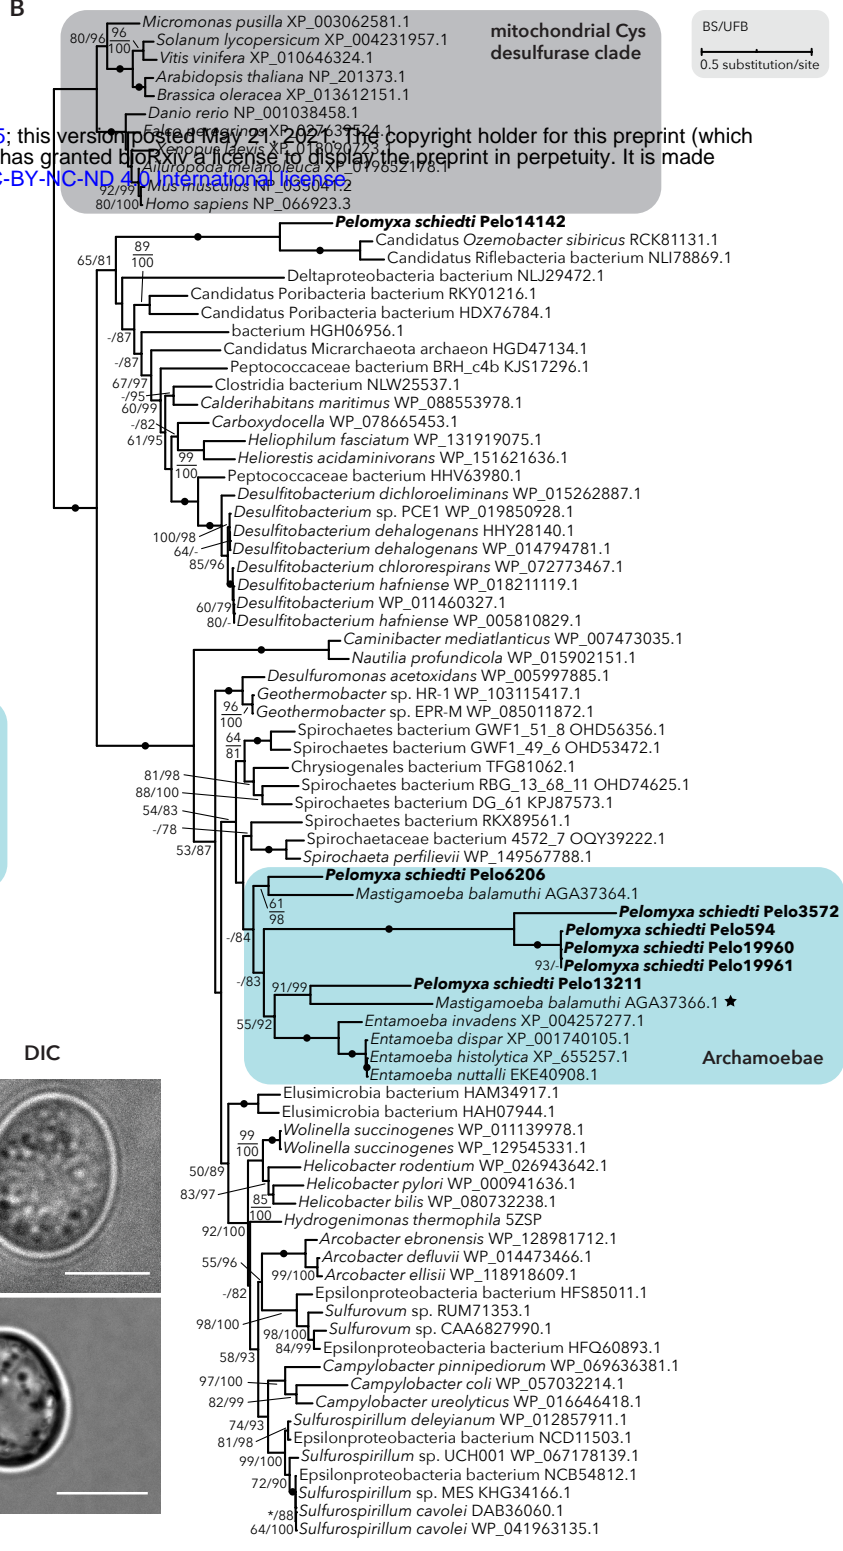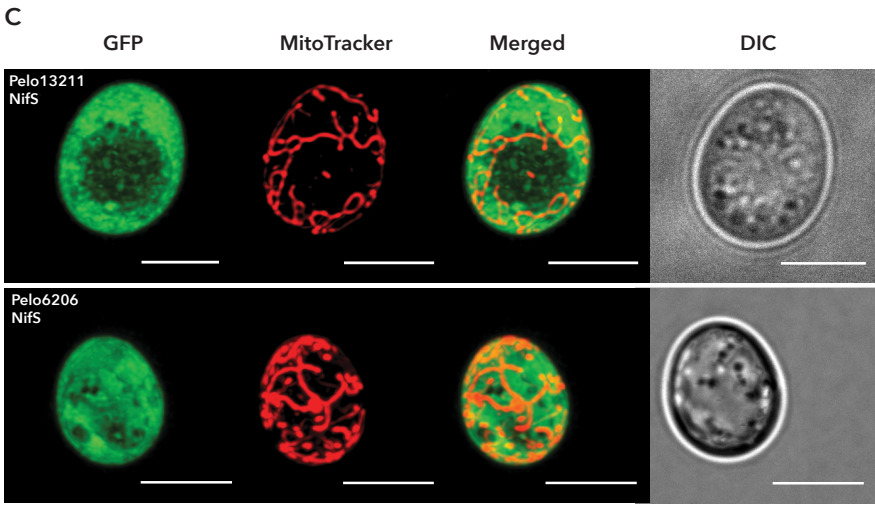

bioRxiv preprint doi: <https://doi.org/10.1101/2021.05.20.444135>; this version posted May 21, 2021. The copyright holder for this preprint (which was not certified by peer review) is the author/funder, who has granted bioRxiv a license to display the preprint in perpetuity. It is made available under aCC-BY-NC-ND 4.0 International license.

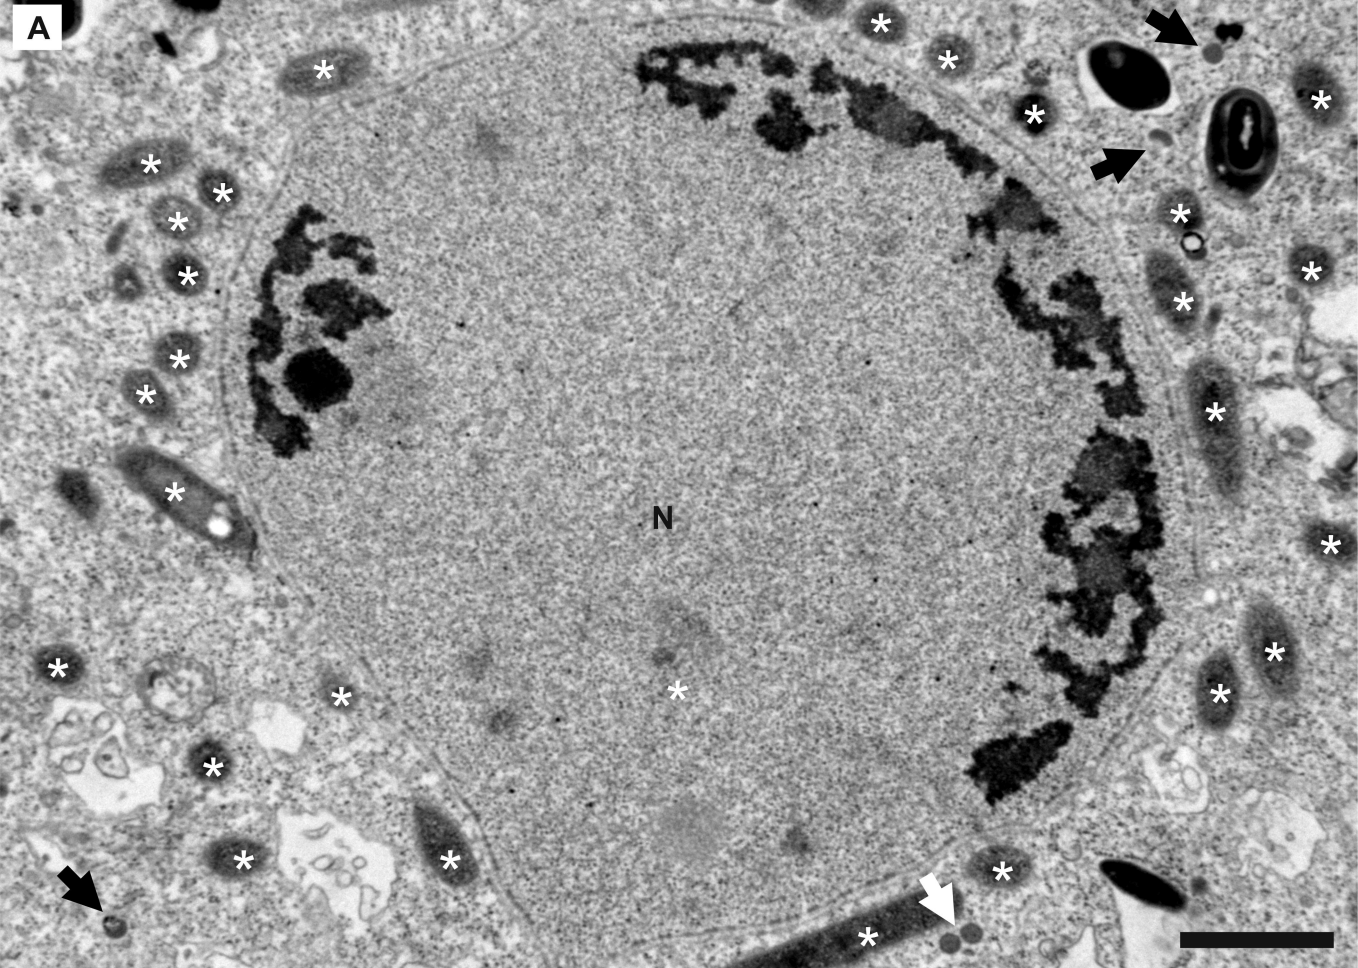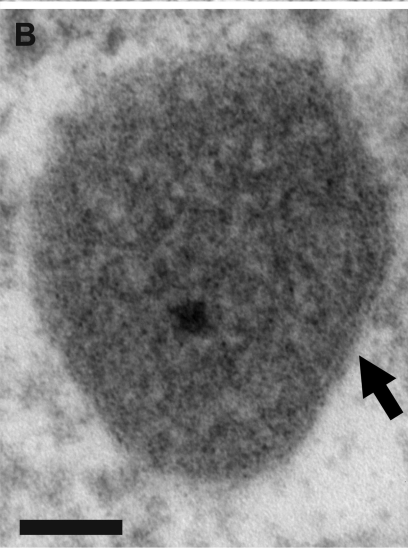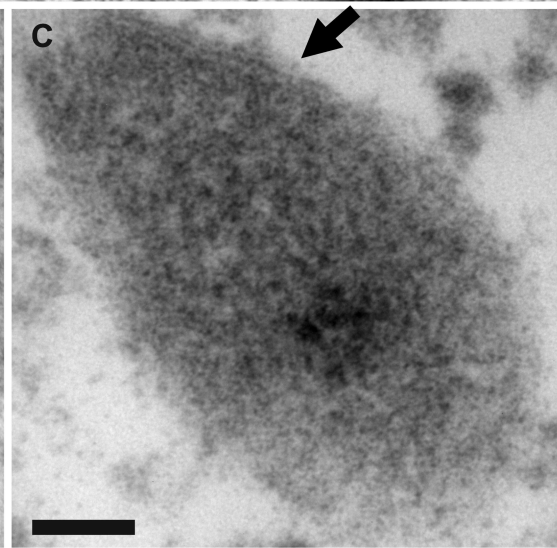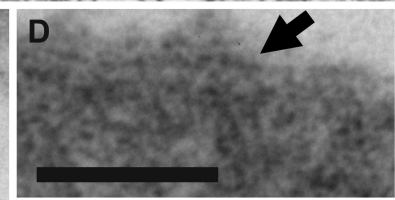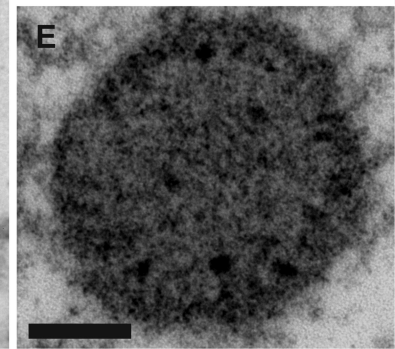

Source: https://biorxiv.org/content/10.1101/2021.05.20.444135v1.full.pdf
